# Supplementary material for: Exposure to the antimicrobial peptide LL-37 produces dendritic cells optimized for immunotherapy
Source: PubMed Central journal article supplement (PMC6682359; doi:10.1080/2162402x.2019.1608106), 2019-05-01

Supplementary Figure 1

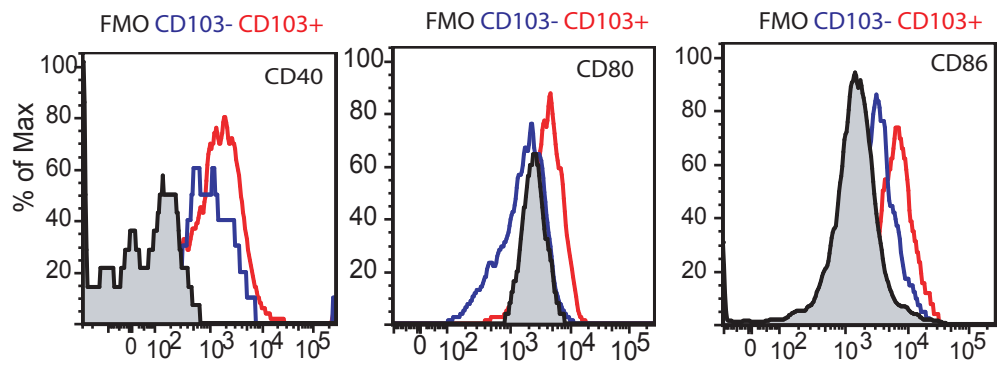

Supplement: koni-08-08-1608106-s003.pdf [file koni-08-08-1608106-s003.pdf]
